# Supplementary material for: Inhibition of protective immunity against Staphylococcus aureus infection by MHC-restricted immunodominance is overcome by vaccination
Source: PubMed Central journal article supplement — Sci Adv. 2020 Apr 1;6(14):eaaw7713. doi: 10.1126/sciadv.aaw7713 (PMC7112766; doi:10.1126/sciadv.aaw7713), 2020-04-01
Supplement: aaw7713_SM.pdf [file aaw7713_SM.pdf]

## Supplementary Materials for

### **Inhibition of protective immunity against *Staphylococcus aureus* infection by MHC-restricted immunodominance is overcome by vaccination**

Youhui Si, Fan Zhao, Pavani Beesetty, Daniela Weiskopf, Zhaotao Li, Qiaomu Tian, Maria-Luisa Alegre, Alessandro Sette, Anita S. Chong, Christopher P. Montgomery\*

\*Corresponding author. Email: [christopher.montgomery@nationwidechildrens.org](mailto:christopher.montgomery@nationwidechildrens.org)

Published 1 April 2020, *Sci. Adv.* **6**, eaaw7713 (2020)  
DOI: 10.1126/sciadv.aaw7713

#### **This PDF file includes:**

Table S1  
Figs. S1 to S4

## SUPPORTING INFORMATION

**Table S1.** Genetic background and MHC haplotypes of the mice used in this study

| Strain                | Background | Igh-1 Allele | MHC Haplotype    | MHC Genes |     |     |   |   |
|-----------------------|------------|--------------|------------------|-----------|-----|-----|---|---|
|                       |            |              |                  | K         | I-A | I-E | D | L |
| C57BL/6               | C57BL/6    | b            | H-2 <sup>b</sup> | b         | b   | -   | b | - |
| B6.H2 <sup>d</sup>    | C57BL/6    | b            | H-2 <sup>d</sup> | d         | d   | d   | d | d |
| BALB/c                | BALB/c     | a            | H-2 <sup>d</sup> | d         | d   | d   | d | d |
| C.B10-H2 <sup>b</sup> | BALB/c     | a            | H-2 <sup>b</sup> | b         | b   | -   | b | - |
| CB.17                 | BALB/c     | b            | H-2 <sup>d</sup> | d         | d   | d   | d | d |

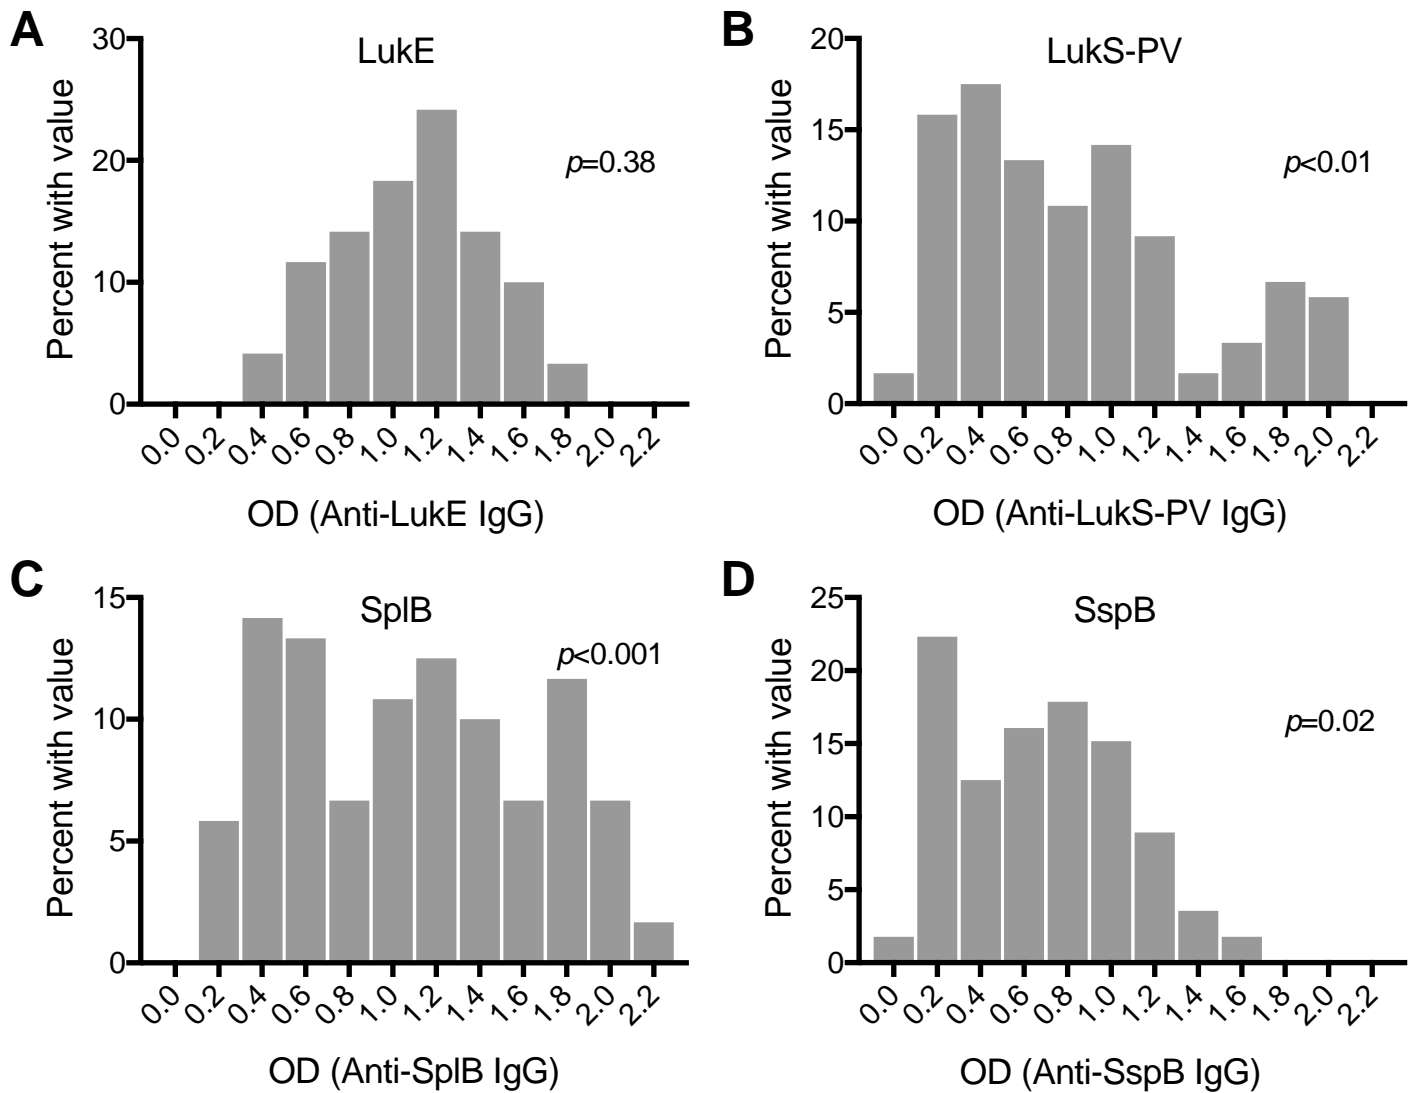

**Figure S1.** Antibody levels against *sae*-regulated antigens in 120 healthy adults. (A) Anti-LukeE IgG levels were normally distributed ( $p=0.38$ , D'Agostino & Pearson normality test). In contrast, antibody levels against LukS-PV (B), SplB (C), and SspB (D) were not normally distributed.

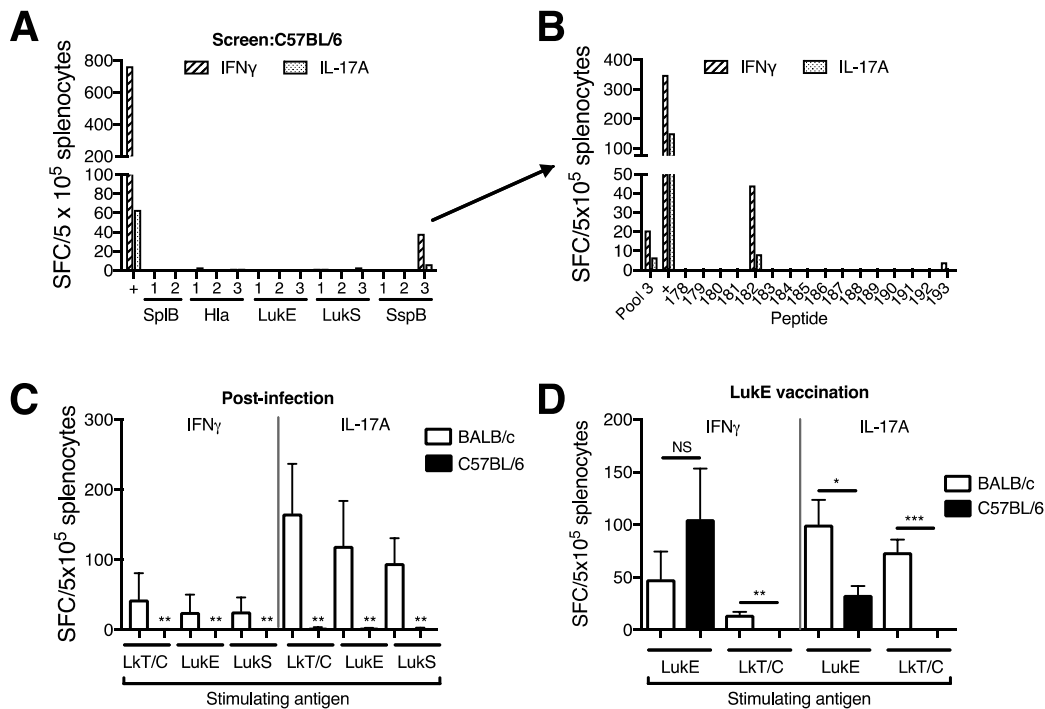

**Figure S2.** Immunogenicity of infection and vaccination. (A) Screening for immunogenic epitopes following infection in C57BL/6 mice identified one pool of peptides from SspB (pool 3) that stimulated moderate IFN $\gamma$  responses by ELISpot. (B) Deconvolution of this peptide pool identified one moderately immunogenic peptide (#182, SspB<sub>297-312</sub>; GRDIHYQEGVPSYEQV) that binds I-A<sup>b</sup> and I-A<sup>d</sup> with moderate affinity (IC<sub>50</sub> – 616 nM and 606 nM, respectively) (3 mice/group from one representative experiment). (C) Following infection of BALB/c and C57BL/6 mice, LukE-specific IFN $\gamma$  and IL-17A responses were driven by LkT/C in BALB/c mice, but there were no LukE or LkT/C-specific responses in C57BL/6 mice (6 mice/group pooled from two separate experiments). Data were analyzed by comparing responses for BALB/c and C57BL/6 mice for each condition. (D) Following vaccination with LukE, there were strong LukE-specific IL-17A and IFN $\gamma$  responses in BALB/c and C57BL/6 mice, but only BALB/c mice had LkT/C-specific responses (4 mice/group from one representative experiment). “+” indicates concanavalin A, a positive control; SFC indicates spot forming colonies. Data were compared using student’s T test. Data presented as mean  $\pm$  SEM. \* indicates  $p < 0.05$ , \*\* indicates  $p < 0.01$ , \*\*\* indicates  $p < 0.001$ .

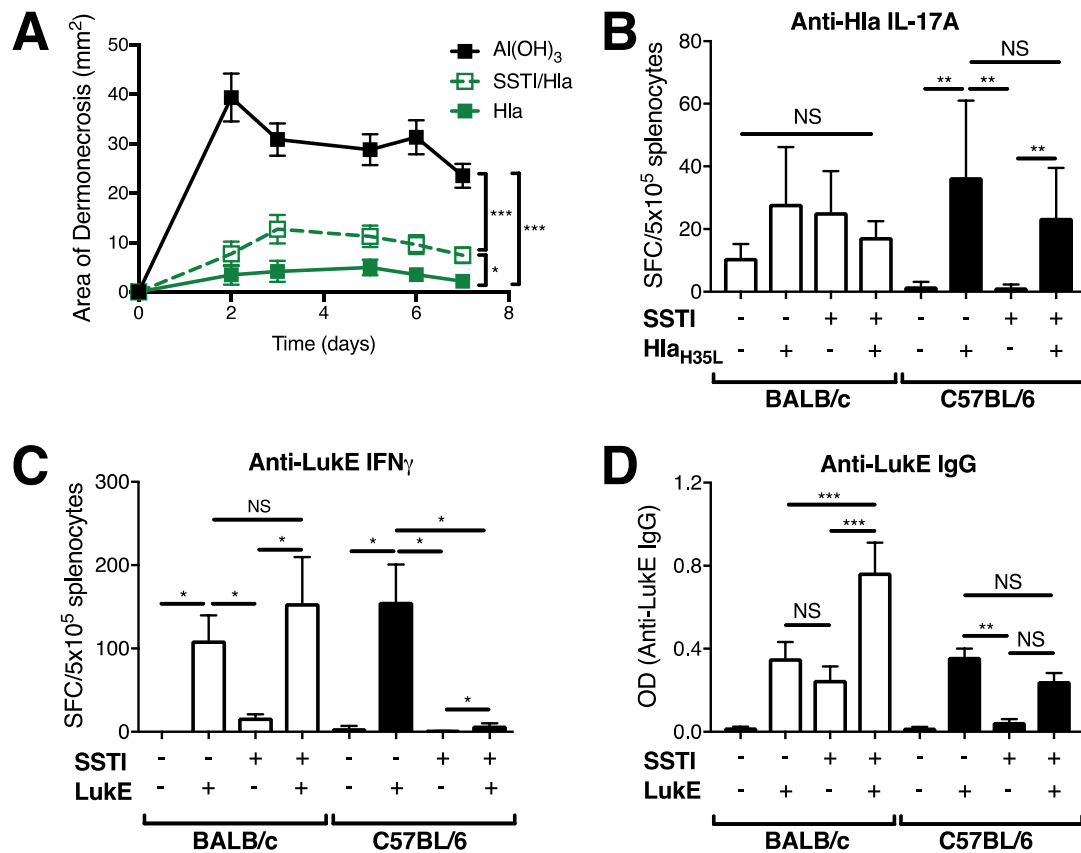

**Figure S3.** Protection and immune responses in concomitant infection/vaccination. (A) C57BL/6 mice were vaccinated with Hla<sub>H35L</sub> alone, received concomitant SSTI and Hla<sub>H35L</sub> vaccination (SSTI/Hla), or control. 4 weeks later, mice were infected with SSTI. Compared with Hla<sub>H35L</sub> vaccination, concomitant SSTI/Hla resulted in inhibition of protection against SSTI, although protection was still observed, compared with controls (12-13 mice/group pooled from two experiments). (B) There was no impact of concomitant vaccination/infection on Hla-specific IL-17A responses in BALB/c or C57BL/6 mice, compared with vaccination alone (4-5 mice/group pooled from two experiments). (C) As we observed with LukE-specific IL-17A responses, concomitant SSTI/Luke vaccination of BALB/c mice resulted in a trend toward higher anti-Luke IFN $\gamma$  responses, compared with vaccination alone, but the differences were not significant. In contrast, concomitant vaccination/infection resulted in strongly decreased anti-Luke responses in C57BL/6 mice, compared with vaccination alone (4 mice/group from one representative experiment). (D) Although anti-Luke IgG levels were higher in BALB/c mice following concomitant infection/vaccination, compared with

vaccination alone, there were no significant differences in C57BL/6 mice (7-10 mice/group pooled from two experiments). SFC indicates spot forming colonies. Data were compared using two-way ANOVA with repeated measures and Tukey's post test (A) or one-way ANOVA with Tukey's post test (B-D). All data are plotted as mean  $\pm$  SEM. \* indicates  $p < 0.05$ , \*\* indicates  $p < 0.01$ , \*\*\* indicates  $p < 0.001$ , NS indicates not significant.

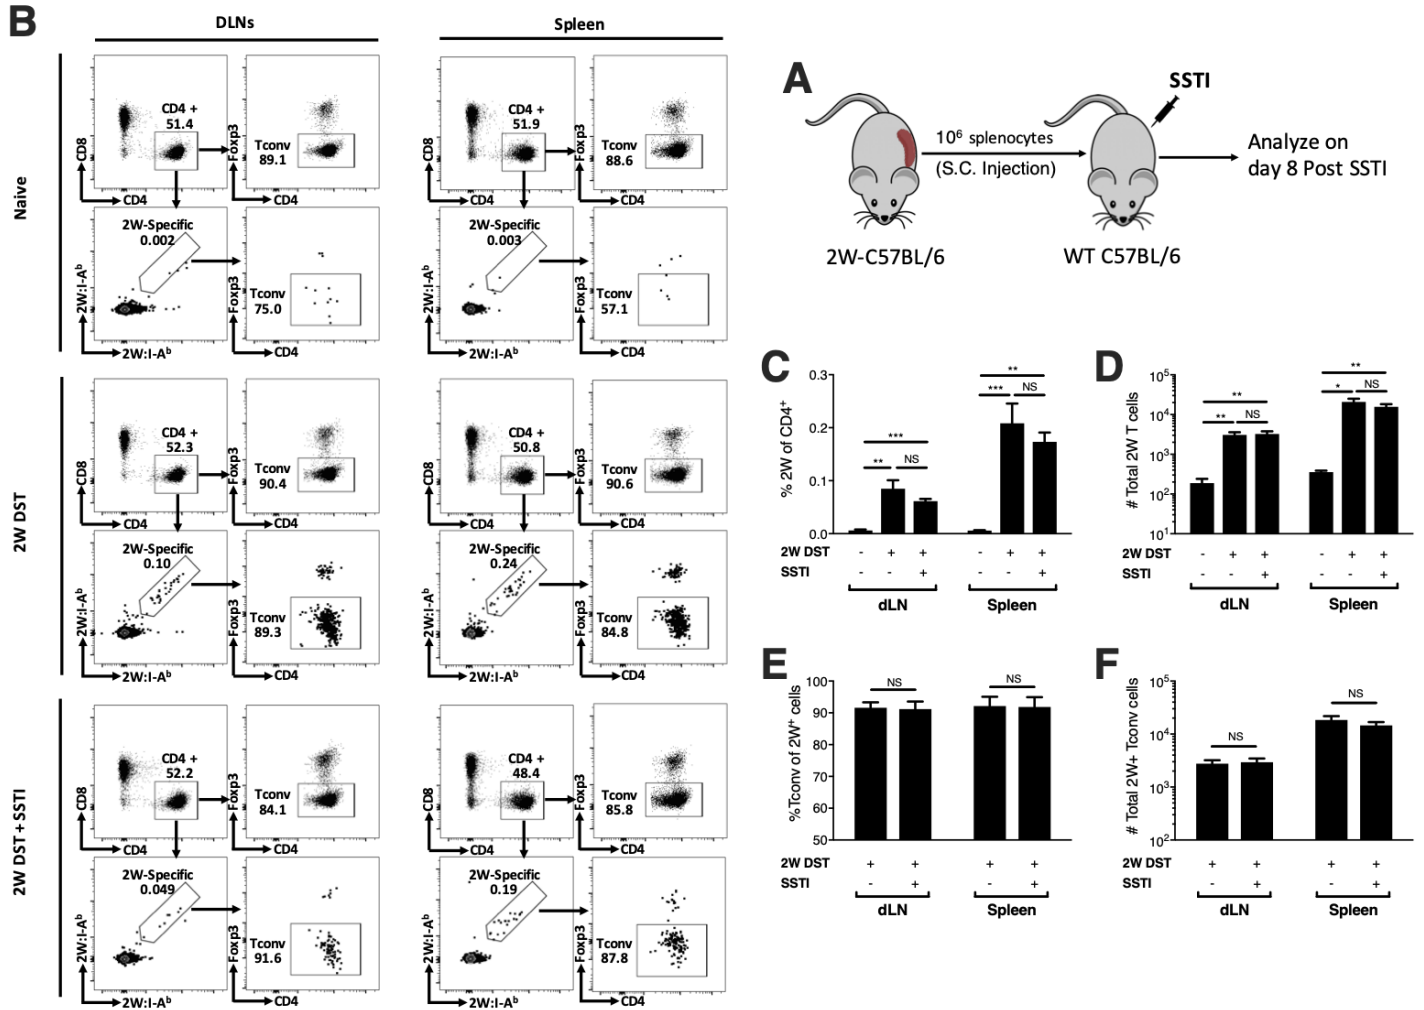

**Figure S4.** Immunodominance of *S. aureus* SSTI did not affect CD4+ T cell responses to the model antigen 2W-OVA. To test whether immunodominant antigens presented during *S. aureus* SSTI interfere with responses against an irrelevant antigen, 2W-OVA splenocyte immunization (s.c.) was performed using cells from 2W-OVA transgenic C57BL/6 mice (donor-specific transfusion, DST), with or without concomitant *S. aureus* SSTI. (A) Experimental model: 2W-specific splenocytes were harvested and transferred into naïve C57BL/6 mice, with concomitant *S. aureus* SSTI (or sham infection with PBS). 8 days later, T cells were harvested and flow cytometry was performed using 2W-specific I-A<sup>b</sup> pMHC tetramers. (B) Representative flow cytometry plots displaying 2W-specific T cells and conventional T cells (Tconv) in draining lymph nodes (dLNs, left) and splenocytes (right). 2W-specific Tconvs were identified as Foxp3<sup>-</sup> cells. Regardless of whether mice received DST alone

or DST + SSTI, there were no significant differences in (C) the percentage of 2W-specific CD4<sup>+</sup> T cells, (D) the number of 2W-specific CD4<sup>+</sup> T cells, (E) the percentage of Tconv 2W-specific cells, or (F) the number of 2W-specific Tconvs. There were 6 mice/group pooled from 2 experiments. Data were compared using one-way ANOVA with Tukey's post test (C,D) or student's T test (E,F). All data are plotted as mean  $\pm$  SEM. \* indicates  $p < 0.05$ , \*\* indicates  $p < 0.01$ , \*\*\* indicates  $p < 0.001$ , NS indicates not significant.
